# Supplementary material for: Improving the prognosis of patients with severely decreased glomerular filtration rate (CKD G4+): conclusions from a Kidney Disease: Improving Global Outcomes (KDIGO) Controversies Conference
Source: PubMed Central journal article supplement — Kidney Int. Author manuscript; Available in PMC 2018 Jun 13. (PMC5998808; doi:10.1016/j.kint.2018.02.006), 2018-04-12
Supplement: NIHMS972815-supplement-Supplement.pdf [file NIHMS972815-supplement-Supplement.pdf]

**Table S1. Various ways that individualized risk-based information may be used by different stakeholders involved in CKD care**

| Stakeholder group                          | Potential value, need, or use of risk information                                                                                                                                                                                                                                                                                                                                                                                                                                                                                         |
|--------------------------------------------|-------------------------------------------------------------------------------------------------------------------------------------------------------------------------------------------------------------------------------------------------------------------------------------------------------------------------------------------------------------------------------------------------------------------------------------------------------------------------------------------------------------------------------------------|
| <b>Patients, family, and caregivers</b>    | <p>Knowledge of risks for the outcomes deemed important</p> <p>Information explained in language that is understandable</p> <p>Care providers offer the insights with patient preferences and values considered in the development of the management plan</p> <p>Education, social class, literacy and beliefs all contribute to self-management</p>                                                                                                                                                                                      |
| <b>Primary care providers</b>              | <p>Knowledge of risk provides confidence in referral, management, and communication with patients – especially patients at low risk, not requiring referral to specialist care</p> <p>Consistent, agreed upon messages from different specialists involved in a patient’s care are desired</p> <p>Recognize that patients often underestimate risks, and specialist healthcare providers may overestimate benefits and underestimate harms of interventions<sup>S1</sup></p>                                                              |
| <b>Specialists, CKD care providers</b>     | <p>Risk prediction tools combined with clinical judgment help identify patients requiring transition to different modalities of care and help guide necessary interventions (including educational initiatives)</p> <p>Differing risk guides intensity of follow-up and appropriate timing of: education and discussion of conservative treatment versus KRT; type of KRT modality; planning for dialysis access; end-of-life decision making</p> <p>Differing risks may also guide decisions concerning investigations and therapies</p> |
| <b>Health system payers, policy makers</b> | <p>Appropriateness, efficiency and affordability of care</p> <p>Risk prediction tools for the key outcomes of advanced CKD, including mortality and cardiovascular complications (heart failure, myocardial ischemia and stroke) combined with good epidemiological data enables prioritization and planning of use of healthcare resource</p> <p>Getting services to remote areas and reaching high risk vulnerable populations, national priorities versus local</p>                                                                    |

CKD, chronic kidney disease; KRT, kidney replacement therapy

**Table S10. Challenges, potential solutions and suggested actions related to increasing the number and quality of clinical trials in CKD G4+ populations**

| <b>Challenge</b>                                                                                                                                                 | <b>Potential solution</b>                                                                               | <b>Suggested action</b>                                                                                                                                                                                       | <b>Actor</b>                                                                                                          |
|------------------------------------------------------------------------------------------------------------------------------------------------------------------|---------------------------------------------------------------------------------------------------------|---------------------------------------------------------------------------------------------------------------------------------------------------------------------------------------------------------------|-----------------------------------------------------------------------------------------------------------------------|
| The clinical needs of CKD G4+ patients are apparent, but other elements of a business case for conducting trials in this population have not been well described | Build the “business case” for industry and other payers to support trials in this population            | Work with large health care providers that have used such business cases to justify their own CKD G4+ programs (e.g., Mayo, Kaiser Permanente). Use this information to create a briefing document for payers | KDIGO, ISN, ASN Kidney Health Initiative, French CKD trial network and others                                         |
| Recruitment and retention to trials is an ongoing challenge in CKD G4+ populations                                                                               | Engage patients to lead and support clinical trials in this population                                  | Commission and support a group to conduct scoping review and propose structures/processes to enable sustained patient engagement                                                                              | KDIGO, ISN, ASN Kidney Health Initiative, French CKD clinical trials network                                          |
| Available trials often do not address the needs of CKD G4+ patients and families                                                                                 | Ensure that the findings of trials in CKD G4+ are maximally relevant for patients and families          | Review existing lists of patient-centered research priorities and commission a new list for CKD G4+ if required                                                                                               | KDIGO                                                                                                                 |
| Available trials are often small or underpowered, and recruitment is challenging                                                                                 | Leverage collaborations between existing national CKD trial networks to facilitate multinational trials | Partner with ISN-ACT to conduct a multinational investigator-initiated clinical trial on common interventions such as bicarbonate, uric acid reduction, ACEi/ARB or phosphate binder therapies                | ISN-Advancing Clinical Trials (ISN- ACT), ASN Kidney Health Initiative, French CKD clinical trials network and others |
| Little is known about how to manage symptoms of CKD G4+, which is a key treatment objective for patients                                                         | Do more studies of symptom management                                                                   | Create a toolbox of validated instruments for common CKD G4+ symptoms that can be used in trials or in supporting studies                                                                                     | KDIGO*                                                                                                                |

\* Although KDIGO could act as a catalyst to establish these initiatives, they will likely require the creation of a dedicated organization or structure to ensure sustainability. ACEi, angiotensin-converting enzyme inhibitor; ARB, angiotensin-receptor blocker; CKD, chronic kidney disease; KDIGO, Kidney Disease: Improving Global Outcomes; ISN, International Society of Nephrology, ASN, American Society of Nephrology.

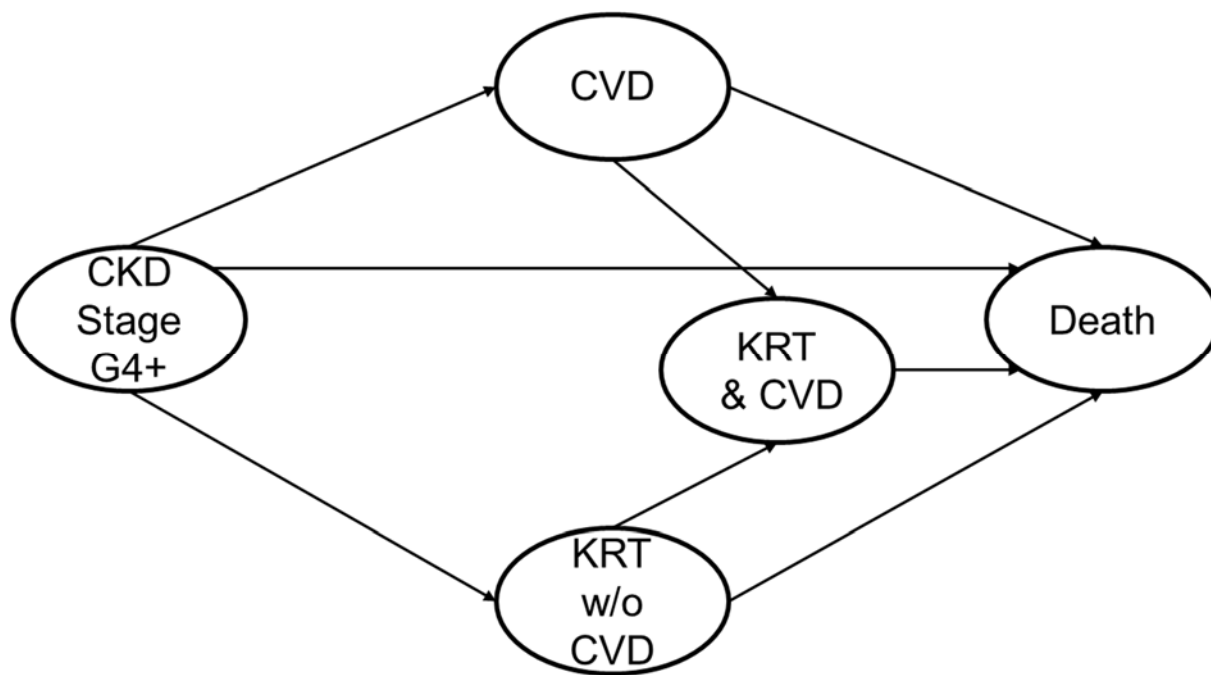

Figure S1. Markov Model – modified graph illustrating the different possible pathways  
Reproduced from Grams *et al.*<sup>S25</sup>

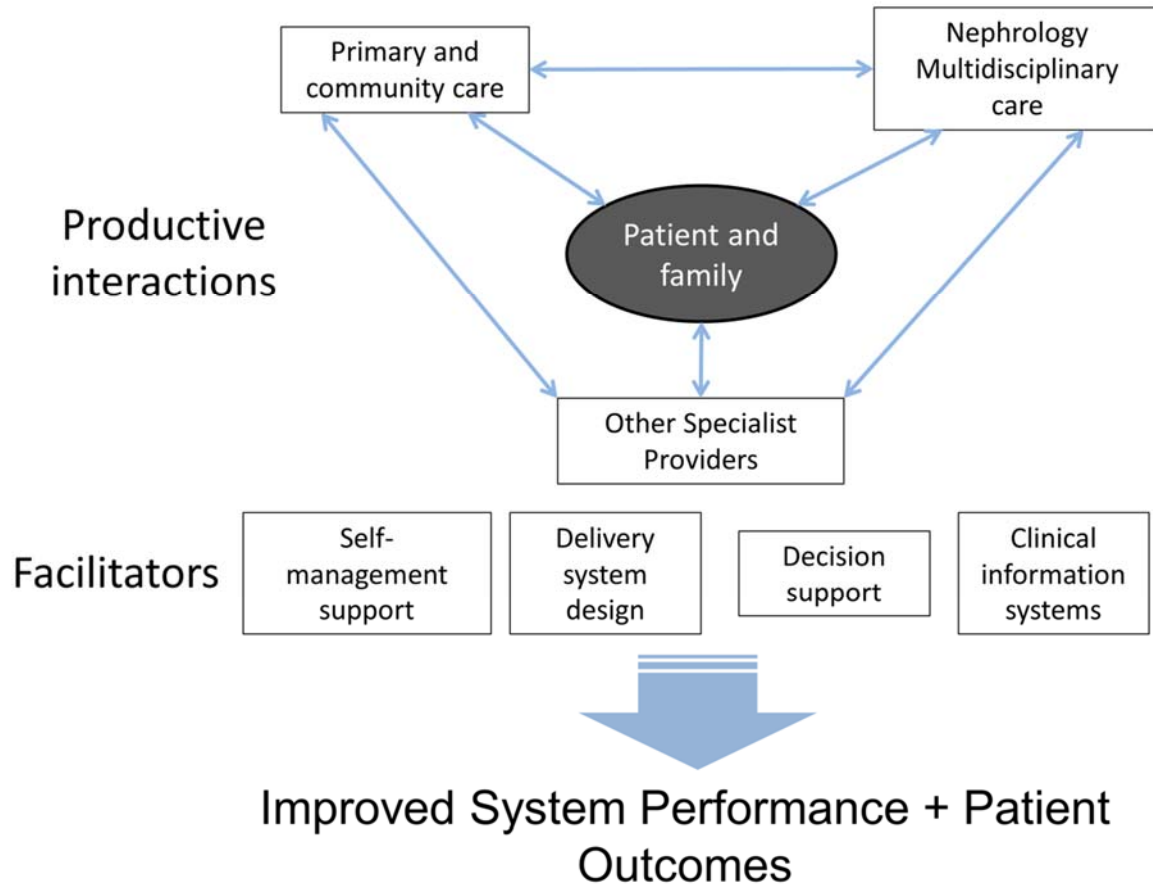

Figure S2. CKD Chronic Care Model

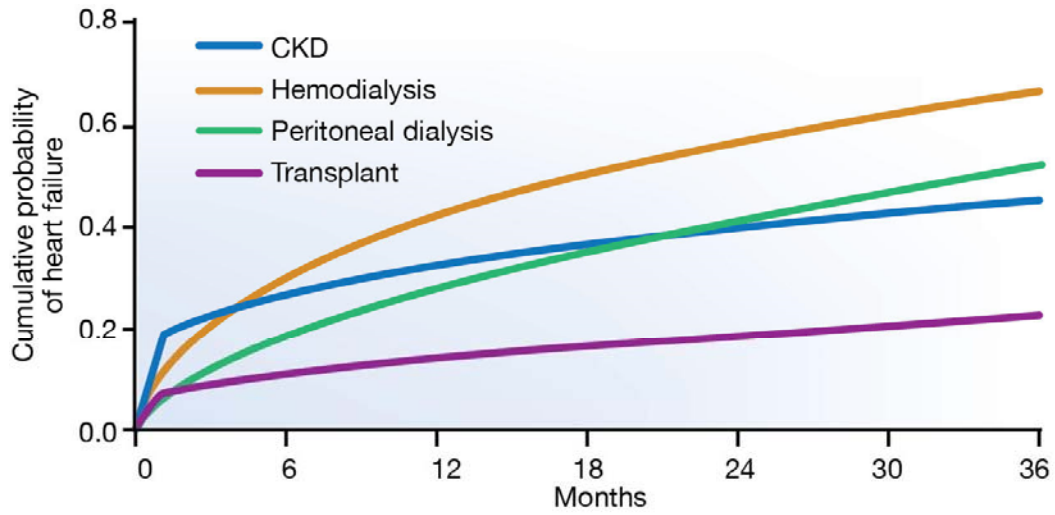

CKD: incident general Medicare CKD patients, age 66 & older, 2001–2003 combined.  
 ESRD: Incident ESRD patients, age 20 & older  
 Patients with CHF at baseline excluded. Probabilities unadjusted.

**Figure S3. Cumulative probability of heart failure in incident patients**  
 Reproduced from the USRDS ADR 2007<sup>S26</sup>

## REFERENCES

- S1. Hoffmann TC, Del Mar C. Clinicians' Expectations of the Benefits and Harms of Treatments, Screening, and Tests: A Systematic Review. *JAMA Intern Med* 2017; **177**: 407-419.
- S2. Berger JS, Brown DL, Becker RC. Low-dose aspirin in patients with stable cardiovascular disease: a meta-analysis. *Am J Med* 2008; **121**: 43-49.
- S3. Major RW, Oozeerally I, Dawson S, *et al.* Aspirin and cardiovascular primary prevention in non-endstage chronic kidney disease: A meta-analysis. *Atherosclerosis* 2016; **251**: 177-182.
- S4. Kidney Disease: Improving Global Outcomes (KDIGO) CKD Work Group. KDIGO 2012 Clinical Practice Guideline for the Evaluation and Management of Chronic Kidney Disease. *Kidney inter., Suppl.* 2013; **3**: 1–150.
- S5. National Institute for Health and Care Excellence. Chronic kidney disease in adults: assessment and management. Clinical guideline. <http://nice.org.uk/guidance/cg182>. Accessed April 7, 2017.
- S6. Susantitaphong P, Sewaralthahab K, Balk EM, *et al.* Short- and long-term effects of alkali therapy in chronic kidney disease: a systematic review. *Am J Nephrol* 2012; **35**: 540-547.
- S7. Xia X, Luo Q, Li B, *et al.* Serum uric acid and mortality in chronic kidney disease: A systematic review and meta-analysis. *Metabolism* 2016; **65**: 1326-1341.
- S8. Li L, Yang C, Zhao Y, *et al.* Is hyperuricemia an independent risk factor for new-onset chronic kidney disease?: A systematic review and meta-analysis based on observational cohort studies. *BMC Nephrol* 2014; **15**: 122.
- S9. Bose B, Badve SV, Hiremath SS, *et al.* Effects of uric acid-lowering therapy on renal outcomes: a systematic review and meta-analysis. *Nephrol Dial Transplant* 2014; **29**: 406-413.
- S10. Fleeman N, Pilkington G, Dundar Y, *et al.* Allopurinol for the treatment of chronic kidney disease: a systematic review. *Health Technol Assess* 2014; **18**: 1-77.
- S11. Kanji T, Gandhi M, Clase CM, *et al.* Urate lowering therapy to improve renal outcomes in patients with chronic kidney disease: systematic review and meta-analysis. *BMC Nephrol* 2015; **16**: 58.

- S12. Goicoechea M, Garcia de Vinuesa S, Verdalles U, *et al.* Allopurinol and progression of CKD and cardiovascular events: long-term follow-up of a randomized clinical trial. *Am J Kidney Dis* 2015; **65**: 543-549.
- S13. Zhang YF, He F, Ding HH, *et al.* Effect of uric-acid-lowering therapy on progression of chronic kidney disease: a meta-analysis. *J Huazhong Univ Sci Technolog Med Sci* 2014; **34**: 476-481.
- S14. Anabtawi A, Miles JM. Metformin: Nonglycemic Effects and Potential Novel Indications. *Endocr Pract* 2016; **22**: 999-1007.
- S15. Salpeter SR, Greyber E, Pasternak GA, *et al.* Risk of fatal and nonfatal lactic acidosis with metformin use in type 2 diabetes mellitus. *Cochrane Database Syst Rev* 2010: CD002967.
- S16. Ekstrom N, Schioler L, Svensson AM, *et al.* Effectiveness and safety of metformin in 51 675 patients with type 2 diabetes and different levels of renal function: a cohort study from the Swedish National Diabetes Register. *BMJ Open* 2012; **2**: e001076.
- S17. Duong JK, Kumar SS, Kirkpatrick CM, *et al.* Population pharmacokinetics of metformin in healthy subjects and patients with type 2 diabetes mellitus: simulation of doses according to renal function. *Clin Pharmacokinet* 2013; **52**: 373-384.
- S18. Garber AJ, Abrahamson MJ, Barzilay JI, *et al.* Consensus Statement by the American Association of Clinical Endocrinologists and American College of Endocrinology on the Comprehensive Type 2 Diabetes Management Algorithm--2016 Executive Summary. *Endocr Pract* 2016; **22**: 84-113.
- S19. Yancy CW, Jessup M, Bozkurt B, *et al.* 2013 ACCF/AHA guideline for the management of heart failure: a report of the American College of Cardiology Foundation/American Heart Association Task Force on Practice Guidelines. *J Am Coll Cardiol* 2013; **62**: e147-239.
- S20. Ponikowski P, Voors AA, Anker SD, *et al.* 2016 ESC Guidelines for the diagnosis and treatment of acute and chronic heart failure: The Task Force for the diagnosis and treatment of acute and chronic heart failure of the European Society of Cardiology (ESC) Developed with the special contribution of the Heart Failure Association (HFA) of the ESC. *Eur Heart J* 2016; **37**: 2129-2200.
- S21. USRDS. Cardiovascular disease in patients with chronic kidney disease. In: 2013 Annual Data Report. [https://www.usrds.org/2013/pdf/v1\\_ch4\\_13.pdf](https://www.usrds.org/2013/pdf/v1_ch4_13.pdf). Accessed Feb 28, 2017.

- S22. Rao NN, Dundon BK, Worthley MI, *et al.* The Impact of Arteriovenous Fistulae for Hemodialysis on the Cardiovascular System. *Semin Dial* 2016; **29**: 214-221.
- S23. Renal Physicians Association. Shared Decision-Making in the Appropriate Initiation of and Withdrawal from Dialysis. Clinical Practice Guideline, 2nd Edition, 190pp. 2010.
- S24. Levin A, Tonelli M, Bonventre J, *et al.* Global kidney health 2017 and beyond: a roadmap for closing gaps in care, research, and policy. *Lancet* 2017; **390**: 1888-1917.
- S25. Grams ME, Sang Y, Ballew SH, *et al.* Predicting timing of clinical outcomes in patients with chronic kidney disease and severely decreased glomerular filtration rate. *Kidney Int in press*. <https://doi.org/10.1016/j.kint.2018.01.009>.
- S26. USRDS. 2007 Annual Data Report. <https://www.usrds.org/atlas07.aspx>. Accessed Feb 28, 2017.



**Table S2. Key competencies required for delivery of CKD G4+ care**

---

1. **Diagnosis and categorizing CKD**  
Assessment of prognosis; identification of kidney-related and non-kidney related complications; initiation of required interventions and determination of a care plan; identification of people with care needs despite prediction of low risk of progression of CKD
2. **Education**  
Education of patient/family/carer concerning CKD; explanation of competing risks of CKD progression and mortality; kidney failure treatment options; coordination of care between patient/family/carer(s) and other members of CKD multidisciplinary team and primary care physician
3. **Planning for kidney failure**  
Evaluation for kidney transplant including living transplantation options and transplant education; assessment of dialysis options (hemodialysis and peritoneal dialysis); creation of dialysis access; provision of end-of-life care, symptom control and palliation; setting goals of care with aligned treatment plans
4. **Nutrition**  
Dietary advice as required, including salt and fluid management
5. **Medications**  
Medicines reconciliation and education of potential harm of over-the-counter medicines; advice with respect to “tablet holidays” during severe intercurrent illness and strategies to avoid/ameliorate acute kidney injury; review of immunizations and implementation of vaccination programs
6. **Psychosocial support**  
Access to counselling; access to housing and transport support; insurance advice

---

CKD, chronic kidney disease.

**Table S3. Selected therapies for future research in CKD G4+**

| Therapy                                                 | Evidence                                                                                                                                                                                                                                                                                                                                                                                                                                                                                                                                                     | Current Guidance                                                                                                                                                                                                                                                                                                                                                                                                                                                                                          |
|---------------------------------------------------------|--------------------------------------------------------------------------------------------------------------------------------------------------------------------------------------------------------------------------------------------------------------------------------------------------------------------------------------------------------------------------------------------------------------------------------------------------------------------------------------------------------------------------------------------------------------|-----------------------------------------------------------------------------------------------------------------------------------------------------------------------------------------------------------------------------------------------------------------------------------------------------------------------------------------------------------------------------------------------------------------------------------------------------------------------------------------------------------|
| <b>Aspirin for prevention of cardiovascular disease</b> | In secondary prevention low-dose aspirin therapy reduces the incidence of adverse cardiovascular events and all-cause mortality. <sup>S2</sup> In primary prevention the evidence does not support the universal use or avoidance of aspirin. A systematic review (3 studies, n=4468) found no clear benefit of aspirin for the primary prevention of cardiovascular events in CKD and no statistically significant reduction in mortality. Major bleeding events were significantly increased with aspirin. <sup>S3</sup>                                   | Both KDIGO <sup>S4</sup> and NICE <sup>S5</sup> recommend that aspirin is indicated for secondary but not primary prevention. NICE have recommended future research to address this question for those at highest risk of cardiovascular disease (What is the clinical effectiveness of low-dose aspirin compared with placebo for primary prevention of cardiovascular disease?)                                                                                                                         |
| <b>Bicarbonate therapy in CKD G4+</b>                   | A meta-analysis of 6 studies (n=312) concluded that bicarbonate therapy was associated with improvement in kidney function and possibly a reduction in progression of CKD. <sup>S6</sup> However, differences in study protocols and small sample sizes precluded definitive conclusions.                                                                                                                                                                                                                                                                    | KDIGO suggest treatment with oral bicarbonate supplementation in people with CKD and serum bicarbonate concentrations < 22 mmol/l; NICE suggest considering oral sodium bicarbonate supplementation in people with CKD G4+ and a serum bicarbonate concentration of < 20 mmol/l.                                                                                                                                                                                                                          |
| <b>Treatment of asymptomatic hyperuricemia</b>          | A systematic review (24 studies n=25,453) found that elevated serum uric acid levels were significantly associated with risk of mortality in patients with CKD. <sup>S7</sup> Another systematic review (13 studies, n=190,718) found a significant positive association with new-onset CKD at follow-up. <sup>S8</sup> However there is little evidence to justify uric acid-lowering in CKD G4+. Recent systematic review and RCT evidence on allopurinol use are inconsistent in terms of the potential benefits of lowering uric acid. <sup>S9-S13</sup> | KDIGO suggested there is insufficient evidence to support or refute the use of agents to lower serum uric acid concentrations in people with CKD and either symptomatic or asymptomatic hyperuricemia in order to delay progression of CKD. NICE make no recommendation but suggested that in people with CKD who are at high risk of progression, the clinical and cost effectiveness of uric acid-lowering agents on the progression of CKD and on mortality should be the subject of further research. |

|                                                                     |                                                                                                                                                                                                                                                                                                                                                                                                                                                                                                                                                                                                                                                                                                                                                                                                                                                                                                                                             |                                                                                                                                                                                                                                                                                                                                                       |
|---------------------------------------------------------------------|---------------------------------------------------------------------------------------------------------------------------------------------------------------------------------------------------------------------------------------------------------------------------------------------------------------------------------------------------------------------------------------------------------------------------------------------------------------------------------------------------------------------------------------------------------------------------------------------------------------------------------------------------------------------------------------------------------------------------------------------------------------------------------------------------------------------------------------------------------------------------------------------------------------------------------------------|-------------------------------------------------------------------------------------------------------------------------------------------------------------------------------------------------------------------------------------------------------------------------------------------------------------------------------------------------------|
| <p><b>Metformin therapy in people with diabetes and CKD G4+</b></p> | <p>Metformin is widely prescribed given evidence suggesting it reduces the risk of myocardial infarction, stroke, atrial fibrillation and all-cause mortality.<sup>S14</sup> However its use in CKD has been limited because of the perceived increased risk of lactic acidosis. A Cochrane analysis of 347 controlled studies covering 70,490 patient-years of metformin use revealed no cases of lactic acidosis and no significant change in plasma lactate.<sup>S15</sup> A Swedish Diabetes Registry study suggested that metformin was well tolerated in people with CKD G3, and its use was associated with 13% lower all-cause mortality in this population.<sup>S16</sup> Blood levels of metformin are influenced by kidney function and the main problem for metformin treatment in CKD G4+ is the prevention of intoxication. Recently published dosage guidelines suggest a maximum of 1 g daily in CKD G4+.<sup>S17</sup></p> | <p>Recent diabetes management guidelines from the American Association of Clinical Endocrinologists/American College of Endocrinology recommended discontinuing metformin at eGFR &lt; 45 mL/min/1.73 m<sup>2</sup>.<sup>S18</sup></p> <p>KDIGO recommended that metformin be discontinued in people with eGFR &lt; 30 ml/min/1.73 m<sup>2</sup>.</p> |
|---------------------------------------------------------------------|---------------------------------------------------------------------------------------------------------------------------------------------------------------------------------------------------------------------------------------------------------------------------------------------------------------------------------------------------------------------------------------------------------------------------------------------------------------------------------------------------------------------------------------------------------------------------------------------------------------------------------------------------------------------------------------------------------------------------------------------------------------------------------------------------------------------------------------------------------------------------------------------------------------------------------------------|-------------------------------------------------------------------------------------------------------------------------------------------------------------------------------------------------------------------------------------------------------------------------------------------------------------------------------------------------------|

CKD, chronic kidney disease; KDIGO, Kidney Disease: Improving Global Outcomes; NICE, National Institute for Health and Nutrition Examination

**Table S4. Definition of heart failure (HF) according to ACCF/AHA and ESC**

| <b>Heart failure (HF) Classification</b>           | <b>Left ventricular ejection fraction (LVEF)</b> | <b>Description from ACCF/AHA</b>                                                                                                                                                                                                                                                                            | <b>Description from ESC</b>                                                                                                                                                                                                 |
|----------------------------------------------------|--------------------------------------------------|-------------------------------------------------------------------------------------------------------------------------------------------------------------------------------------------------------------------------------------------------------------------------------------------------------------|-----------------------------------------------------------------------------------------------------------------------------------------------------------------------------------------------------------------------------|
| <b>HF with reduced ejection fraction (HFrEF)</b>   | LVEF ≤ 40%†                                      | Also referred to as systolic HF. Randomized controlled trials have mainly enrolled patients with HFrEF, and it is only in these patients that efficacious therapies have been demonstrated to date.                                                                                                         | Symptoms ± signs <sup>a</sup>                                                                                                                                                                                               |
| <b>HF with preserved ejection fraction (HFpEF)</b> | LVEF ≥ 50%                                       | Also referred to as diastolic HF. Several different criteria have been used to further define HFpEF. The diagnosis of HFpEF is challenging because it is largely one of excluding other potential non-cardiac causes of symptoms suggestive of HF. To date, efficacious therapies have not been identified. | Symptoms ± signs <sup>a</sup><br><br>Elevated levels of natriuretic peptides <sup>b</sup> ;<br><br>At least one additional criterion:<br>a. relevant structural heart disease (LVH and/or LAE),<br>b. diastolic dysfunction |
| <b>HFpEF, borderline‡</b>                          | LVEF 41-49%                                      | These patients fall into a borderline or intermediate group. Their characteristics, treatment patterns, and outcomes appear similar to those of patients with HFpEF.                                                                                                                                        | Symptoms ± signs <sup>a</sup><br><br>Elevated levels of natriuretic peptides <sup>b</sup> ;<br><br>At least one additional criterion:<br>a. relevant structural heart disease (LVH and/or LAE),<br>b. diastolic dysfunction |
| <b>HFpEF, improved</b>                             | LVEF > 40%                                       | It has been recognized that a subset of patients with HFpEF previously had HFrEF. These patients with improvement or recovery in EF may be clinically distinct from those with persistently preserved or reduced EF. Further research is needed to better characterize these patients.                      |                                                                                                                                                                                                                             |

<sup>a</sup>Signs may not be present in the early stages of HF (especially in HFpEF) and in patients treated with diuretics.

<sup>b</sup>BNP >35 pg/ml and/or NT-proBNP >125 pg/ml.

†ESC defines HFrEF as LVEF < 40%

‡Also known as heart failure mid-range ejection fraction (HFmrEF) as coined by ESC whose LVEF is defined as 40-49%

ACCF, American College of Cardiology Foundation; AHA, American Heart Association; BNP, B-type natriuretic peptide; ESC, European Society of Cardiology; LAE, left atrial enlargement; LVH, left ventricular hypertrophy; NT-proBNP, N-terminal pro-B type natriuretic peptide. Adapted from ACCF/AHA<sup>S19</sup> and ESC<sup>S20</sup>

**Table S5. Risk factors for HF in patients with CKD G4+**

| <b>Traditional risk factors</b> | <b>Non-traditional risk factors</b> |
|---------------------------------|-------------------------------------|
| Age                             | Volume overload                     |
| Male sex                        | Anemia                              |
| Hypertension                    | Mineral metabolism abnormalities    |
| Diabetes mellitus               | Cause of CKD                        |
| Smoking                         | Aldosterone                         |
| Obesity                         | Inflammation                        |
| Coronary artery disease         | Residual renal function             |
| Left ventricular hypertrophy    | Sympathetic overactivity            |
|                                 | Endogenous cardiac glycosides       |
|                                 | Uremic toxins                       |
|                                 | Hyperkalemia                        |
|                                 | Oxidative stress                    |
|                                 | Malnutrition                        |
|                                 | Myocardial stunning                 |

**Table S6. Adjusted hazard ratios of all-cause death in patients with heart failure, by CKD status, 2010-2011**

|                     | No CKD       |           |         | CKD          |           |         |
|---------------------|--------------|-----------|---------|--------------|-----------|---------|
|                     | Hazard ratio | CI        | p-value | Hazard ratio | CI        | p-value |
| Age: 66-69          | reference    |           |         |              |           |         |
| 70-74               | 1.36         | 1.33-1.40 | <.0001  | 1.13         | 1.06-1.20 | <.0001  |
| 75-84               | 2.62         | 2.55-2.68 | <.0001  | 1.61         | 1.53-1.70 | <.0001  |
| 85+                 | 7.10         | 6.93-7.27 | <.0001  | 3.14         | 2.98-3.31 | <.0001  |
| Male                | reference    |           |         |              |           |         |
| Female              | 0.83         | 0.82-0.84 | <.0001  | 0.89         | 0.87-0.92 | <.0001  |
| White               | reference    |           |         |              |           |         |
| Black/Af Am         | 1.02         | 1.00-1.05 | 0.106   | 0.95         | 0.91-0.99 | 0.0152  |
| Other               | 0.80         | 0.78-0.83 | <.0001  | 0.85         | 0.80-0.90 | <.0001  |
| Diabetes            | 1.14         | 1.13-1.16 | <.0001  | 1.09         | 1.06-1.12 | <.0001  |
| Hypertension        | 0.85         | 0.84-0.86 | <.0001  | 0.73         | 0.70-0.77 | <.0001  |
| Other cause         | reference    |           |         |              |           |         |
| Heart failure: none | reference    |           |         |              |           |         |
| Systolic            | 2.10         | 2.02-2.18 | <.0001  | 2.34         | 2.24-2.44 | <.0001  |
| Diastolic           | 1.79         | 1.71-1.86 | <.0001  | 1.93         | 1.83-2.02 | <.0001  |
| Both                | 2.02         | 1.88-2.17 | <.0001  | 2.21         | 2.05-2.39 | <.0001  |
| Unspecified         | 1.90         | 1.87-1.94 | <.0001  | 1.80         | 1.73-1.86 | <.0001  |

Reproduced from the USRDS ADR 2013, volume 1<sup>S21</sup>

**Table S7. Consequences of arteriovenous fistula on the cardiovascular system**

| <b>Immediate</b>                         | <b>Days-weeks</b>                   | <b>Weeks-months</b>                                          |
|------------------------------------------|-------------------------------------|--------------------------------------------------------------|
| Decrease in blood pressure               | Increase in blood volume            | Further increase in cardiac output                           |
| Reduced arterial stiffness               | Increase in LV end diastolic volume | Increase in LV mass and LV size                              |
| Decrease in total peripheral resistance  |                                     | Increase in atrial chamber size                              |
| Increase in heart rate and stroke volume |                                     | Diastolic and systolic dysfunction                           |
| Increase in cardiac output               |                                     | Increase in pulmonary flows and later pulmonary hypertension |

LV, left ventricular. Reproduced from Rao *et al.*<sup>S22</sup>



**Table S8. Recommendations from the Renal Physicians Association regarding forgoing dialysis<sup>S23</sup>**

---

**If appropriate, forgo dialysis for patients with CKD or ESRD in certain, well-defined situations:**

- Patients with decision-making capacity, who being fully informed and making voluntary choices, refuse dialysis
- Patients who no longer possess decision-making capacity who have previously indicated refusal of dialysis in an oral or written advance directive
- Patients who no longer possess decision-making capacity and whose properly appointed legal surrogates refuse dialysis
- Patients with irreversible, profound neurological impairment such that they lack signs of thought, sensation, purposeful behavior, and awareness of self and environment.

**Consider forgoing dialysis for CKD or ESRD patients who have a very poor prognosis or for whom dialysis cannot be provided safely. Included in these categories of patients are the following:**

- Those whose medical condition precludes the technical process of dialysis because the patient is unable to cooperate (e.g., advanced dementia patient who pulls out dialysis needles or profound hypotension)
- Those who have a terminal illness from non-renal causes (acknowledging that some in this condition may perceive benefit from and choose to undergo dialysis)
- Those with CKD G5 older than age 75 years who met two or more of the following statistically significant very poor prognosis criteria: 1) clinician response of “No” to the ‘surprise’ question, 2) high comorbidity score, 3) significantly impaired functional status (e.g., Karnofsky score less than 40), 4) severe chronic malnutrition (e.g., serum albumin < 2.5 g/dl).

Forgo dialysis if initiating or continuing dialysis is deemed to be harmful, of no benefit, or merely prolongs a child’s dying process. The decision to forgo dialysis must be made in consultation with the child’s parents. Give children and adolescents the opportunity to participate in the decision to forgo dialysis to the extent that their developmental abilities and health status allow.

Consider forgoing dialysis in a patient with a terminal illness whose long term prognosis is poor if the patient and the family are in agreement with the physician that dialysis would not be of benefit or the burdens would outweigh the benefit.

Develop a palliative care plan for all pediatric patients with ESRD from the time of diagnosis and for children with AKI who forgo dialysis. The development of a palliative care plan is a continuation of the process of advance care planning and should be family-centered.

---

AKI, acute kidney injury; CKD, chronic kidney disease; ESRD, end-stage renal disease.

**Table S9. Key goals and activities identified by the Clinical Trials Group at the Vancouver Kidney Health Summit**

| Goals                                                                                 | Activities                                                                                                                                                                   |
|---------------------------------------------------------------------------------------|------------------------------------------------------------------------------------------------------------------------------------------------------------------------------|
| <p><b>Encourage and promote the conduct of clinical trials in people with CKD</b></p> | Develop value proposition for trials in kidney disease                                                                                                                       |
|                                                                                       | Promote trials in areas of unmet need and orphan diseases                                                                                                                    |
|                                                                                       | Engage activated patient groups, payers and other stakeholders, aiming to substantially increase the number of clinical trials in CKD                                        |
|                                                                                       | Promote models for early conditional approval of new therapies to encourage investment                                                                                       |
|                                                                                       | Work to increase the number of people with CKD who are included in CV, diabetes, and oncology trials, aiming to reflect the prevalence of CKD in such patient populations    |
|                                                                                       | Develop a regular stand-alone meeting to review ongoing and planned clinical trials with CKD patients                                                                        |
| <p><b>Optimize the design of clinical trials in people with CKD</b></p>               | Develop and refine appropriate endpoints for CKD trials and promote their uptake and dissemination                                                                           |
|                                                                                       | Assess factors that lead to "success" or "failure" of clinical trials in CKD trials                                                                                          |
|                                                                                       | Facilitate strategies to pre-select patients for clinical trials according to their risk for progression or likelihood to respond to an intervention                         |
|                                                                                       | Develop innovative trial designs to enhance feasibility and success of CKD trials                                                                                            |
|                                                                                       | Implement priority setting exercises for interventions to be tested in clinical trials globally and by region                                                                |
|                                                                                       | Establish recommendations for clinical trials in people with CKD for use by ethical and regulatory boards, including opportunities for sample collection for future analyses |
| <p><b>Grow capacity in conducting clinical trials in people with CKD</b></p>          | Develop networks of kidney clinical trialists including community physicians, and other specialties, etc.                                                                    |
|                                                                                       | Catalogue sites/centers capable of participating in kidney trials                                                                                                            |
|                                                                                       | Develop and implement professional training in trial design and conduct, involving nephrology and related specialties                                                        |

CKD, chronic kidney disease; CV, cardiovascular Reproduced with permission from Levin A *et al.* (2017)<sup>S24</sup>
